# Supplementary material for: Fully integrated lab-on-a-disc for simultaneous analysis of biochemistry and immunoassay from whole blood
Source: Royal Society of Chemistry journal article supplement (doi:10.1039/c0lc00205d), 2010-11-01
Supplement: c0lc00205d.pdf [file c0lc00205d.pdf]

## Fully integrated lab-on-a-disc for simultaneous analysis of biochemistry and immunoassay from whole blood

Beom Seok Lee<sup>1</sup>, Yang Ui Lee<sup>1</sup>, Han-Sang Kim<sup>1</sup>, Tae-Hyeong Kim<sup>2</sup>, Jiwoon Park<sup>2</sup>, Jeong-Gun Lee<sup>1</sup>, Jintae Kim<sup>1</sup>, Hanshin Kim<sup>1</sup>, Wee Gyo Lee<sup>3</sup>, and Yoon-Kyoung Cho<sup>\*2</sup>

<sup>1</sup> Samsung Electronics Co. Ltd., 416, Maetan-3Dong, Yeongtong-Gu, Suwon-City, Gyeonggi-Do, 443-746, Korea,

<sup>2</sup> Ulsan National Institute of Science and Technology (UNIST), Banyeon-ri 100, Ulsan, 689-798, Korea. E-mail: [ykcho@unist.ac.kr](mailto:ykcho@unist.ac.kr); Fax: +82-52-217-2509; Tel: +82-52-217-2511

<sup>3</sup> Ajou University School of Medicine, San 5, Woncheon-Dong, Yeongtong-Gu, Suwon-City, 442-721, Korea.

\*Correspondence should be addressed to Prof. Yoon-Kyoung Cho, [ykcho@unist.ac.kr](mailto:ykcho@unist.ac.kr)

**The Movie** shows the full process of biochemical analysis and immunoassay on a disc starting from whole blood. The microfluidic layout of the disc and the corresponding assay protocol are described in **Fig. 1** and **section 3.1**. In addition, snapshot images are shown in **Fig. 3** and **Fig. 4**, respectively. The total process takes 30 minutes.
